# Supplementary material
Source: Springer Nature journal article supplement (https://www.springermedizin.de/resource/supplementary/12889_2011_3224_MOESM1_ESM.pdf/9488554)

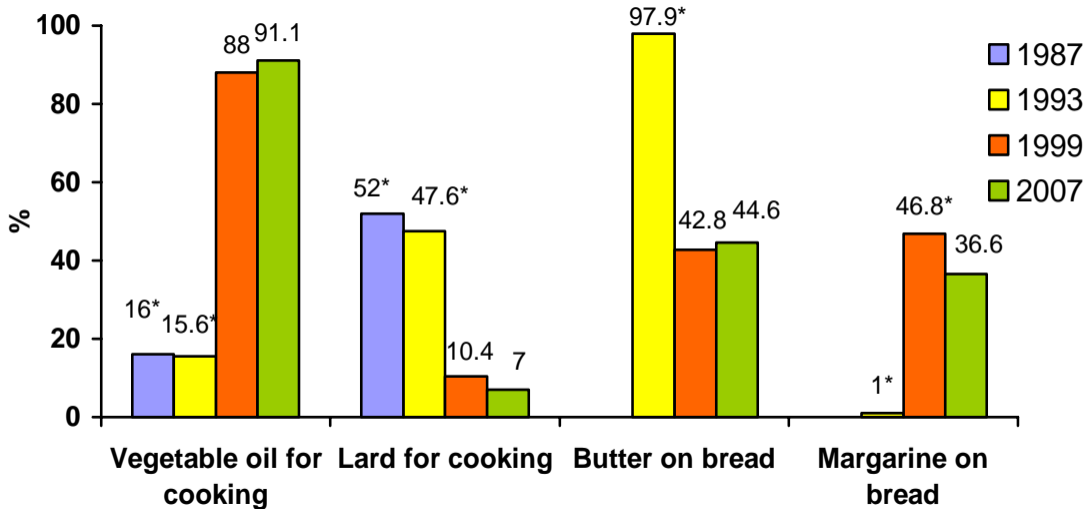

Supplement: MOESM1 [file 9488554]
